# Supplementary material for: Investigation of Epoxidized Palm Oils as Green Processing Aids and Activators in Rubber Composites
Source: Hindawi journal article supplement (doi:10.1155/2019/2152408), 2019-05-05
Supplement: f1 [file 2152408.f1.docx]

Fig. S1. FT-IR spectra of epoxidized palm oil. Fig. S2. TEM images of elastomer composites with epoxidized palm oil.
